# Supplementary material for: Evacuation after the Great East Japan Earthquake was associated with poor dietary intake: The Fukushima Health Management Survey
Source: PubMed Central journal article supplement — J Epidemiol. 2016 Nov 15;27(1):14–23. doi: 10.1016/j.je.2016.08.002 (PMC5328735; doi:10.1016/j.je.2016.08.002), 2016-11-15
Supplement: je-27-014-s001.pdf [file je-27-014-s001.pdf]

**eTable 1.** Prevalence ratios for dietary intake of each group on modified Poisson regression analyses stratified by age

|                                          |                                         | Age group, years         |                          |                          |                          |                          |                          |
|------------------------------------------|-----------------------------------------|--------------------------|--------------------------|--------------------------|--------------------------|--------------------------|--------------------------|
|                                          |                                         | 15-49                    | 50-64                    | ≥65                      | 15-49                    | 50-64                    | ≥65                      |
|                                          |                                         | PR (95% CI) <sup>a</sup> | PR (95% CI) <sup>a</sup> | PR (95% CI) <sup>a</sup> | PR (95% CI) <sup>b</sup> | PR (95% CI) <sup>b</sup> | PR (95% CI) <sup>b</sup> |
|                                          | <b>living arrangement</b>               |                          |                          |                          |                          |                          |                          |
| <b>Fruits and vegetables (Total)</b>     | Relatives' home or own home             | 1.00 (reference)         |
|                                          | Rental house, apartment                 | 0.55 (0.42-0.72)         | 0.83 (0.67-1.02)         | 0.71 (0.62-0.82)         | 0.62 (0.47-0.83)         | 0.93 (0.75-1.16)         | 0.73 (0.62-0.84)         |
|                                          | Evacuation Shelter or temporary housing | 0.74 (0.65-0.85)         | 0.91 (0.82-1.01)         | 0.84 (0.79-0.91)         | 0.79 (0.68-0.91)         | 0.97 (0.87-1.08)         | 0.85 (0.79-0.92)         |
|                                          | <b>living arrangement</b>               |                          |                          |                          |                          |                          |                          |
| <b>Fruits and vegetables (non-juice)</b> | Relatives' home or own home             | 1.00 (reference)         |
|                                          | Rental house, apartment                 | 0.40 (0.29-0.56)         | 0.74 (0.60-0.91)         | 0.65 (0.56-0.75)         | 0.47 (0.34-0.65)         | 0.84 (0.67-1.05)         | 0.67 (0.58-0.78)         |
|                                          | Evacuation Shelter or temporary housing | 0.64 (0.54-0.75)         | 0.86 (0.77-0.95)         | 0.81 (0.75-0.87)         | 0.69 (0.58-0.81)         | 0.92 (0.82-1.02)         | 0.82 (0.76-0.88)         |
|                                          | <b>living arrangement</b>               |                          |                          |                          |                          |                          |                          |
| <b>Fruits and vegetables (juice)</b>     | Relatives' home or own home             | 1.00 (reference)         |
|                                          | Rental house, apartment                 | 1.07 (0.90-1.28)         | 1.33 (1.11-1.58)         | 1.25 (1.09-1.44)         | 1.16 (0.96-1.39)         | 1.36 (1.13-1.64)         | 1.19 (1.03-1.38)         |
|                                          | Evacuation Shelter or temporary housing | 1.03 (0.95-1.13)         | 1.15 (1.06-1.26)         | 1.12 (1.04-1.20)         | 1.08 (0.98-1.18)         | 1.17 (1.06-1.28)         | 1.09 (1.02-1.18)         |
|                                          | <b>living arrangement</b>               |                          |                          |                          |                          |                          |                          |
| <b>Meat</b>                              | Relatives' home or own home             | 1.00 (reference)         |
|                                          | Rental house, apartment                 | 0.79 (0.67-0.93)         | 0.81 (0.67-0.98)         | 0.77 (0.64-0.91)         | 0.84 (0.71-1.00)         | 0.81 (0.67-0.99)         | 0.78 (0.66-0.94)         |
|                                          | Evacuation Shelter or temporary housing | 0.89 (0.82-0.97)         | 0.90 (0.82-0.99)         | 0.88 (0.80-0.95)         | 0.92 (0.84-1.00)         | 0.90 (0.82-1.00)         | 0.89 (0.81-0.97)         |
|                                          | <b>living arrangement</b>               |                          |                          |                          |                          |                          |                          |
| <b>Soybean products</b>                  | Relatives' home or own home             | 1.00 (reference)         |
|                                          | Rental house, apartment                 | 0.73 (0.64-0.85)         | 0.91 (0.82-1.02)         | 0.90 (0.82-0.98)         | 0.76 (0.66-0.88)         | 0.91 (0.81-1.03)         | 0.92 (0.83-1.01)         |
|                                          | Evacuation Shelter or temporary housing | 0.86 (0.80-0.92)         | 0.96 (0.90-1.01)         | 0.95 (0.90-0.99)         | 0.87 (0.81-0.94)         | 0.96 (0.90-1.01)         | 0.96 (0.91-1.02)         |
|                                          | <b>living arrangement</b>               |                          |                          |                          |                          |                          |                          |
| <b>Milk products</b>                     | Relatives' home or own home             | 1.00 (reference)         |
|                                          | Rental house, apartment                 | 0.73 (0.58-0.92)         | 0.89 (0.73-1.08)         | 0.76 (0.65-0.87)         | 0.83 (0.65-1.05)         | 0.95 (0.78-1.17)         | 0.79 (0.68-0.92)         |

|                       |                                         |                  |                  |                  |                  |                  |                  |
|-----------------------|-----------------------------------------|------------------|------------------|------------------|------------------|------------------|------------------|
| <b>Fish</b>           | Evacuation Shelter or temporary housing | 0.85 (0.76-0.96) | 0.94 (0.86-1.04) | 0.87 (0.81-0.94) | 0.91 (0.81-1.02) | 0.98 (0.88-1.08) | 0.89 (0.82-0.96) |
|                       | <b>living arrangement</b>               |                  |                  |                  |                  |                  |                  |
|                       | Relatives' home or own home             | 1.00 (reference) |
|                       | Rental house, apartment                 | 0.82 (0.69-0.97) | 0.99 (0.87-1.12) | 0.91 (0.81-1.01) | 0.84 (0.71-1.00) | 1.02 (0.89-1.16) | 0.93 (0.83-1.03) |
|                       | Evacuation Shelter or temporary housing | 0.90 (0.83-0.98) | 0.99 (0.93-1.06) | 0.95 (0.90-1.00) | 0.92 (0.84-1.00) | 1.01 (0.94-1.08) | 0.96 (0.91-1.02) |
| <b>Rice and bread</b> | <b>living arrangement</b>               |                  |                  |                  |                  |                  |                  |
|                       | Relatives' home or own home             | 1.00 (reference) |
|                       | Rental house, apartment                 | 0.98 (0.81-1.18) | 0.97 (0.79-1.19) | 0.87 (0.72-1.05) | 0.98 (0.81-1.18) | 0.97 (0.79-1.19) | 0.87 (0.72-1.05) |
|                       | Evacuation Shelter or temporary housing | 0.99 (0.90-1.09) | 0.99 (0.89-1.09) | 0.93 (0.85-1.02) | 0.99 (0.92-1.03) | 0.99 (0.89-1.09) | 0.93 (0.85-1.02) |

CI, confidence interval; PR, prevalence ratio.

<sup>a</sup> Sex-adjusted.

<sup>b</sup> Further adjusted for age (15-49, 50-64, or ≥65 years), drinking status (≥once/month, previous drinker, <once/month), smoking status (current smoker, never smoker, previous smoker), perceived health condition (very good, good, normal, bad, very bad), mental health status (Kessler Psychological Distress Scale <13 or ≥13), education status (elementary school and middle school, senior middle school, vocational college, undergraduate school, and graduate school), unemployment (yes or no), and change of work (yes or no).
